# Supplementary material for: Lineage-Specific Evolutionary Histories and Regulation of Major Starch Metabolism Genes during Banana Ripening
Source: PubMed Central journal article supplement (PMC5133247; doi:10.3389/fpls.2016.01778), 2016-12-02
Supplement: Presentation_1.pdf [file Presentation_1.pdf]

## SUPPLEMENTARY INFORMATION

### Supplementary Method S1. Determination of physicochemical parameters of banana fruits.

Carbon dioxide production was measured at constant room temperature of 23°C by gas chromatography after conservation of individual banana fruits in hermetic jars during two hours (Hewlett Packard 5890A, GmbH, Waldbronn, Germany). Raw data were normalised as follows:

$$A = \frac{(V \times C)}{(0.0464)} \div \frac{W}{T}$$

where A, V, C, W and T represent respectively normalised carbon dioxide production expressed in  $\mu\text{l.Kg}^{-1}.\text{h}^{-1}$ , the jar free volume in litres, raw data from the chromatogram expressed in  $\mu\text{V}$ , fruit weight in kilograms (Kg) and the period of confinement expressed in hours (h). The constant (0.0464) corresponds to the slope of the standard curve. Fruit color was estimated through the CIE L\*a\*b\* color space system using a Minolta Chroma Meter CR-200 (Minolta, Roissy, France). L\*, a\* and b\* values represent lightness of color from 0 (black) to 100 (diffuse white), its position between green (-300) and red (+300) and its position between blue (-300) and yellow (+300), respectively. Pulp firmness and peel hardness were measured using a TA-XT2 penetrometer as described by Chillet et al., 2008. All these parameters were determined for five biological replicates per condition.

The starch content (g/100 g of flour) was computed as follows:

$$\text{Starch}\% = \frac{(Abs \times Slope \times 0.9)}{(1000 \times DM)} \times \frac{100}{0.5} \times \frac{10}{0.05} \times 100 - FG$$

where Starch% is the percentage of starch on dry weight basis (g starch per 100g dried product); Abs is the absorbance at 510 nm against blank; Slope is the slope of the calibration curve daily obtained with a glucose solution; 0.9 is the conversion factor between starch and glucose;  $1000 \times DM$  is the conversion of sample dry weight from mg to g (after correction with its residual moisture content);  $\frac{100}{0.5}$  is the ratio between the total volume (100 ml) and the volume of test sample used (0.5 ml) after alpha-amylase attack;  $\frac{10}{0.05}$  is the ratio between the total volume (10 ml) at amyloglucosidase action stage and the volume (0.05 ml) used for final measuring of glucose (glucose-oxidase/peroxidase/4-aminoantipirine activity); 100 is the

result given in percentage and  $FG$  is the percentage of free glucose (g free glucose per 100g dried product).

The free glucose content (g/100 g of flour) was computed as follows:

$$FG = \frac{(A \times Slope \times 1000)}{DM}$$

where  $FG$  is the free glucose content on dry basis,  $A$  is the absorbance measured for free glucose,  $Slope$  is the slope of the standard curve (in  $\mu\text{g}\cdot\text{ml}^{-1}$ ),  $1000$  is the conversion between mg to g and  $DM$  is the amount of dried sample (in mg).

**Supplementary Table S1.** The 12 plant predicted proteomes used in the study

| <b>Plant species</b>           | <b>Protein number</b> | <b>Genome version</b> | <b>Link and reference</b>                                                                                                                                                        |
|--------------------------------|-----------------------|-----------------------|----------------------------------------------------------------------------------------------------------------------------------------------------------------------------------|
| <i>Musa acuminata</i>          | 36,542                | Version 1             | <a href="http://banana-genome.cirad.fr">http://banana-genome.cirad.fr</a> (D'Hont <i>et al.</i> , 2012)                                                                          |
| <i>Oryza sativa</i>            | 39,045                | MSU version 7         | <a href="http://rice.plantbiology.msu.edu">http://rice.plantbiology.msu.edu</a> (Ouyang <i>et al.</i> , 2007)                                                                    |
| <i>Brachypodium distachyon</i> | 26,552                | Version 1.2           | <a href="http://www.brachypodium.org">http://www.brachypodium.org</a> (International Brachypodium Initiative, 2010)                                                              |
| <i>Sorghum bicolor</i>         | 34,009                | Version 1.4           | <a href="http://genome.jgi-psf.org/Sorbi1/Sorbi1_home.html">http://genome.jgi-psf.org/Sorbi1/Sorbi1_home.html</a> (Paterson <i>et al.</i> , 2009)                                |
| <i>Zea mays</i>                | 38,915                | Version 5b.60         | <a href="http://www.maizesequence.org/index.html">http://www.maizesequence.org/index.html</a> (Schnable <i>et al.</i> , 2009)                                                    |
| <i>Phoenix dactylifera</i>     | 41,660                | Version 1             | <a href="http://www.kacst.edu.sa/en/depts/jcg/home/Pages/default.aspx">http://www.kacst.edu.sa/en/depts/jcg/home/Pages/default.aspx</a> (Al-Mssallem <i>et al.</i> , 2013)       |
| <i>Arabidopsis thaliana</i>    | 27,417                | TAIR version 10       | <a href="http://www.arabidopsis.org">http://www.arabidopsis.org</a> (Arabidopsis Genome Initiative, 2000)                                                                        |
| <i>Vitis vinifera</i>          | 26,346                | Version 1             | <a href="http://www.genoscope.cns.fr/spip/Vitis-vinifera-whole-genome.html">http://www.genoscope.cns.fr/spip/Vitis-vinifera-whole-genome.html</a> (Jaillon <i>et al.</i> , 2007) |
| <i>Solanum lycopersicum</i>    | 34,728                | ITAG Release 2.3      | <a href="http://solgenomics.net/organism/Solanum_lycopersicum/genome">http://solgenomics.net/organism/Solanum_lycopersicum/genome</a> (The Tomato Genome Consortium, 2012)       |
| <i>Solanum tuberosum</i>       | 39,031                | Version 3.4           | <a href="http://solanaceae.plantbiology.msu.edu/pgsc_download.shtml">http://solanaceae.plantbiology.msu.edu/pgsc_download.shtml</a> (The Potato Genome Consortium, 2011)         |
| <i>Prunus persica</i>          | 28,689                | Version 1.0           | <a href="http://www.phytozome.org/peach">http://www.phytozome.org/peach</a> (Verde <i>et al.</i> , 2013)                                                                         |
| <i>Fragaria vesca</i>          | 34,894                | Version 2.0           | <a href="http://www.strawberrygenome.org">http://www.strawberrygenome.org</a> (Shulaev <i>et al.</i> , 2011)                                                                     |

**Supplementary Table S2.** Protein reference list used for sequence clustering

| Gene family | Plant species               | Locus identifier     | Gene name       | Protein identifier | Source  |
|-------------|-----------------------------|----------------------|-----------------|--------------------|---------|
| AGPase      | <i>Arabidopsis thaliana</i> | At1g05610            | <i>AtAPS2</i>   | Q7YKW3             | Uniprot |
| AGPase      | <i>Arabidopsis thaliana</i> | At1g27680            | <i>AtAPL2</i>   | P55230             | Uniprot |
| AGPase      | <i>Arabidopsis thaliana</i> | At2g21590            | <i>AtAPL4</i>   | Q9SIK1             | Uniprot |
| AGPase      | <i>Arabidopsis thaliana</i> | At4g39210            | <i>AtAPL3</i>   | P55231             | Uniprot |
| AGPase      | <i>Arabidopsis thaliana</i> | At5g19220            | <i>AtADG2</i>   | P55229             | Uniprot |
| AGPase      | <i>Arabidopsis thaliana</i> | At5g48300            | <i>AtAPS1</i>   | P55228             | Uniprot |
| AGPase      | <i>Zea mays</i>             | GRMZM2G027955_P01    | <i>ZmAGP1</i>   | NP_001105717       | GenBank |
| AGPase      | <i>Zea mays</i>             | GRMZM2G429899_P01    | <i>ZmSH2</i>    | NP_001121104       | GenBank |
| AGPase      | <i>Zea mays</i>             | GRMZM2G163437_P01    | <i>ZmL2</i>     | AAK69628           | GenBank |
| AGPase      | <i>Zea mays</i>             | GRMZM2G068506_P01    | <i>ZmBT2</i>    | NP_001105038       | GenBank |
| AGPase      | <i>Zea mays</i>             | GRMZM2G106213_P01    | <i>ZmAGP2</i>   | NP_001105178       | GenBank |
| AGPase      | <i>Zea mays</i>             | GRMZM2G391936_P01    | <i>ZmAPL1</i>   | NP_001106017       | GenBank |
| AGPase      | <i>Zea mays</i>             | GRMZM2G144002_P01    | <i>ZmAPL4</i>   | NP_001106058       | GenBank |
| AGPase      | <i>Oryza sativa</i>         | Os08g25734           | <i>OsAPS1</i>   | NP_001061603       | GenBank |
| AGPase      | <i>Oryza sativa</i>         | Os09g12660           | <i>OsAPS2</i>   | NP_001062808       | GenBank |
| AGPase      | <i>Oryza sativa</i>         | Os03g52460           | <i>OsAPL1</i>   | NP_001051184       | GenBank |
| AGPase      | <i>Oryza sativa</i>         | Os01g44220           | <i>OsAPL2</i>   | NP_001043654       | GenBank |
| AGPase      | <i>Oryza sativa</i>         | Os05g50380           | <i>OsAPL3</i>   | NP_001056424       | GenBank |
| AGPase      | <i>Oryza sativa</i>         | Os07g13980           | <i>OsAPL4</i>   | NP_001059276       | GenBank |
| AGPase      | <i>Sorghum bicolor</i>      | Sb03g028850          | <i>SbSH2</i>    | AAB94012           | GenBank |
| AGPase      | <i>Solanum tuberosum</i>    | PGSC0003DMP400015875 | <i>StGLGL3</i>  | P55243             | Uniprot |
| AGPase      | <i>Solanum tuberosum</i>    | PGSC0003DMP400027938 | <i>StGLGL2</i>  | P55242             | Uniprot |
| AGPase      | <i>Solanum tuberosum</i>    | PGSC0003DMP400054142 | <i>StGLGS</i>   | P23509             | Uniprot |
| GBSS        | <i>Arabidopsis thaliana</i> | At1g32900            | <i>AtWAXY</i>   | Q9MAQ0             | Uniprot |
| GBSS        | <i>Zea mays</i>             | GRMZM2G024993_P02    | <i>ZmWAXY</i>   | P04713             | Uniprot |
| GBSS        | <i>Oryza sativa</i>         | Os06g04200           | <i>OsWAXY</i>   | Q0DEV5             | Uniprot |
| GBSS        | <i>Oryza sativa</i>         | Os07g22930           | <i>OsGBSS2</i>  | AU030570           | GenBank |
| GBSS        | <i>Solanum tuberosum</i>    | PGSC0003DMP400021398 | <i>StWAXY</i>   | Q00775             | Uniprot |
| SS          | <i>Arabidopsis thaliana</i> | At1g11720            | <i>AtSS3</i>    | F4IAG2             | Uniprot |
| SS          | <i>Arabidopsis thaliana</i> | At3g01180            | <i>AtSS2</i>    | Q9MAC8             | Uniprot |
| SS          | <i>Arabidopsis thaliana</i> | At4g18240            | <i>AtSS4</i>    | Q0WVX5             | Uniprot |
| SS          | <i>Arabidopsis thaliana</i> | At5g24300            | <i>AtSS1</i>    | Q9FNF2             | Uniprot |
| SS          | <i>Oryza sativa</i>         | Os02g51070           | <i>OsSSII-2</i> | Q6Z2T8             | Uniprot |
| SS          | <i>Oryza sativa</i>         | Os06g12450           | <i>OsSSII-3</i> | Q0DDE3             | Uniprot |
| SS          | <i>Oryza sativa</i>         | Os10g30156           | <i>OsSSII-1</i> | Q7XE48             | Uniprot |
| SS          | <i>Solanum tuberosum</i>    | PGSC0003DMP400032329 | <i>StSS1</i>    | P93568             | Uniprot |
| SS          | <i>Solanum tuberosum</i>    | PGSC0003DMP400002384 | <i>StSSII</i>   | Q43847             | Uniprot |
| SBE         | <i>Arabidopsis thaliana</i> | At2g36390            | <i>AtSBE2.1</i> | O23647             | Uniprot |
| SBE         | <i>Arabidopsis thaliana</i> | At5g03650            | <i>AtSBE2.2</i> | Q9LZS3             | Uniprot |
| SBE         | <i>Arabidopsis thaliana</i> | At3g20440            | <i>AtBE1</i>    | D2WL32             | Uniprot |
| SBE         | <i>Zea mays</i>             | GRMZM2G032628_P01    | <i>ZmBEII</i>   | Q08047             | Uniprot |
| SBE         | <i>Oryza sativa</i>         | Os06g51084           | <i>OsSBE1</i>   | Q01401             | Uniprot |
| DBE         | <i>Arabidopsis thaliana</i> | At2g39930            | <i>AtISA1</i>   | O04196             | Uniprot |
| DBE         | <i>Arabidopsis thaliana</i> | At1g03310            | <i>AtISA2</i>   | Q8L735             | Uniprot |
| DBE         | <i>Arabidopsis thaliana</i> | At4g09020            | <i>AtISA3</i>   | Q9M0S5             | Uniprot |
| AMY         | <i>Arabidopsis thaliana</i> | At1g69830            | <i>AtAMY3</i>   | Q94A41             | Uniprot |

|     |                             |            |                 |        |         |
|-----|-----------------------------|------------|-----------------|--------|---------|
| AMY | <i>Arabidopsis thaliana</i> | At1g76130  | <i>AtAMY2</i>   | Q8LFG1 | Uniprot |
| AMY | <i>Arabidopsis thaliana</i> | At4g25000  | <i>AtAMY1</i>   | Q8VZ56 | Uniprot |
| AMY | <i>Oryza sativa</i>         | Os01g25510 | <i>OsAMY1B</i>  | Q0JMV4 | Uniprot |
| AMY | <i>Oryza sativa</i>         | Os02g52710 | <i>OsAMY1.1</i> | P17654 | Uniprot |
| AMY | <i>Oryza sativa</i>         | Os06g49970 | <i>OsAMY2A</i>  | Q0D9J1 | Uniprot |
| AMY | <i>Oryza sativa</i>         | Os08g36900 | <i>OsAMY1.4</i> | P27934 | Uniprot |
| AMY | <i>Oryza sativa</i>         | Os08g36910 | <i>OsAMY1.3</i> | P27933 | Uniprot |
| AMY | <i>Oryza sativa</i>         | Os09g28400 | <i>OsAMY1.2</i> | P27932 | Uniprot |
| AMY | <i>Oryza sativa</i>         | Os09g28420 | <i>OsAMY1.6</i> | P27937 | Uniprot |
| BAM | <i>Arabidopsis thaliana</i> | At2g32290  | <i>AtBAM6</i>   | Q8L762 | Uniprot |
| BAM | <i>Arabidopsis thaliana</i> | At2g45880  | <i>AtBAM7</i>   | O80831 | Uniprot |
| BAM | <i>Arabidopsis thaliana</i> | At3g23920  | <i>AtBAM1</i>   | Q9LIR6 | Uniprot |
| BAM | <i>Arabidopsis thaliana</i> | At4g00490  | <i>AtBAM2</i>   | O65258 | Uniprot |
| BAM | <i>Arabidopsis thaliana</i> | At4g15210  | <i>AtBAM5</i>   | P25853 | Uniprot |
| BAM | <i>Arabidopsis thaliana</i> | At4g17090  | <i>AtBAM3</i>   | O23553 | Uniprot |
| BAM | <i>Arabidopsis thaliana</i> | At5g18670  | <i>AtBAM9</i>   | Q8VYW2 | Uniprot |
| BAM | <i>Arabidopsis thaliana</i> | At5g45300  | <i>AtBAM8</i>   | Q9FH80 | Uniprot |
| BAM | <i>Arabidopsis thaliana</i> | At5g55700  | <i>AtBAM4</i>   | Q9FM68 | Uniprot |

---

**Supplementary Table S3.** List of primer sequences used for qRT-PCR experiments and characteristics of corresponding amplicons

| Gene name      | Primer ID | Primer sequence (5'-3') | Amplicon size (bp) | E ( $\pm$ SE) <sup>*</sup> |
|----------------|-----------|-------------------------|--------------------|----------------------------|
| <i>MaACT2</i>  | Ma1067F   | GGAGTCTGGTCCCTGCTATCG   | 147                | 1.981 ( $\pm$ 0.00494)     |
|                | Ma1067R   | AAAGTCCGATGCAACAAAGC    |                    |                            |
| <i>MaAGP1</i>  | Ma1149F   | CTCGGGCTTTGTTTCATGTTT   | 125                | 2.01 ( $\pm$ 0.00992)      |
|                | Ma1149R   | TGTGCTCCCACAAACATCAT    |                    |                            |
| <i>MaAGP4</i>  | Ma1027F   | AATGCCAGTTCTCGACGTTT    | 132                | 1.946 ( $\pm$ 0.00523)     |
|                | Ma1027R   | CTGCATTAGGGCAGCTGATT    |                    |                            |
| <i>MaAGP5</i>  | Ma1202F   | ATGATGGGTGCTGACGACTA    | 90                 | 1.856 ( $\pm$ 0.0229)      |
|                | Ma1202R   | TGTGTTCTCTCCCCTCCAA     |                    |                            |
| <i>MaAGP6</i>  | Ma1190F   | GCGAGGGCTTCTACATACGA    | 132                | 2.001 ( $\pm$ 0.0106)      |
|                | Ma1190R   | GCCGTAGCATCCTCTCCTC     |                    |                            |
| <i>MaAGP7</i>  | Ma1188F   | CGAAGGATTCAGCAAGGAAG    | 129                | 1.896 ( $\pm$ 0.0265)      |
|                | Ma1188R   | TGGGCACATACAAAGCTATCA   |                    |                            |
| <i>MaSS3</i>   | Ma1018F   | CACTTCATCCACACCTTCCA    | 88                 | 1.922 ( $\pm$ 0.00442)     |
|                | Ma1018R   | CGACAGATTCATTTTCGTTTCG  |                    |                            |
| <i>MaSS8</i>   | Ma1205F   | CTTGGCTGAGACGAGGACTT    | 123                | 1.918 ( $\pm$ 0.0209)      |
|                | Ma1205R   | TGCCTCAACACCTACAGGAAC   |                    |                            |
| <i>MaSS10</i>  | Ma1208F   | CGTGCCGAATGGTATAGCTC    | 99                 | 1.962 ( $\pm$ 0.00546)     |
|                | Ma1208R   | ACGGGAATGGTTCAACTCAC    |                    |                            |
| <i>MaGBSS1</i> | Ma1007F   | AAGATCGGCTTCAGACCAGA    | 82                 | 1.969 ( $\pm$ 0.00768)     |
|                | Ma1007R   | GGGACTCTGAGGATTGTCCA    |                    |                            |
| <i>MaGBSS2</i> | Ma1073F   | GGAGCTGCTGGTAGTGAAGC    | 87                 | 2.08 ( $\pm$ 0.0459)       |
|                | Ma1073R   | TAGTCGCTTTCAGGGAGTGG    |                    |                            |
| <i>MaGBSS3</i> | Ma1110F   | ATTGGAGCAACAGCTTGCAT    | 86                 | 2.07 ( $\pm$ 0.00164)      |
|                | Ma1110R   | CATGAGCCAGAGGAACATTG    |                    |                            |
| <i>MaGBSS4</i> | Ma1109F   | GTGAAGCAATGCACCACATT    | 85                 | NA                         |
|                | Ma1109R   | TGTTGTGAATGGCGTAGGTG    |                    |                            |
| <i>MaSBE1</i>  | Ma1227F   | CATCGGAAGCTAGGTCAGGA    | 114                | 1.889 ( $\pm$ 0.0333)      |
|                | Ma1227R   | TCCAAGATTCCCAGGTTGAC    |                    |                            |
| <i>MaSBE2</i>  | Ma1233F   | TCCTGGAACGTTGGTTTCTC    | 89                 | 2.008 ( $\pm$ 0.0055)      |
|                | Ma1233R   | TGGTGATGTGTTTGGTCGTT    |                    |                            |
| <i>MaSBE3</i>  | Ma1235F   | AGGCCTCGTCTTTCCTAGT     | 92                 | 1.957 ( $\pm$ 0.00527)     |
|                | Ma1235R   | ATGCACAACCCAGCAATCTT    |                    |                            |
| <i>MaSBE4</i>  | Ma1238F   | GACTTGCAATAGTGGCATTTCG  | 100                | 1.939 ( $\pm$ 0.0137)      |
|                | Ma1238R   | CTGAGGCGACTACGGGACTA    |                    |                            |
| <i>MaSBE5</i>  | Ma1243F   | ACCAACCAGCCTCTCATTG     | 93                 | 1.952 ( $\pm$ 0.0109)      |
|                | Ma1243R   | GAACCGCAGTTGTTTATGCTC   |                    |                            |
| <i>MaDBE1</i>  | Ma1211F   | TGTGATCCAAATGTTTCAGAAGG | 101                | 1.985 ( $\pm$ 0.054)       |
|                | Ma1211R   | AGGCACAAAGTTCAATCCACA   |                    |                            |
| <i>MaDBE3</i>  | Ma1218F   | CCTTCAACACAAGCCATCTG    | 99                 | 1.902 ( $\pm$ 0.0251)      |
|                | Ma1218R   | CGTAGGGCACAGGCTTACTC    |                    |                            |
| <i>MaDBE4</i>  | Ma1224F   | CGAAGGTGTACCATTACAGCA   | 83                 | 1.899 ( $\pm$ 0.00424)     |
|                | Ma1224R   | CACAGGATCATGGCTTTGC     |                    |                            |
| <i>MaBAM4</i>  | Ma1020F   | CATGAACCTTCAGACATTACAGG | 145                | 1.961 ( $\pm$ 0.00501)     |
|                | Ma1020R   | CAGTGTAGCGATTCTACTGCATC |                    |                            |
| <i>MaBAM6</i>  | Ma1030F   | ATCCGCTGCCTGATGACTAC    | 114                | 2.083 ( $\pm$ 0.00823)     |
|                | Ma1030R   | ATTGTTTGCTATGCGTGCAG    |                    |                            |
| <i>MaBAM7</i>  | Ma1034F   | TGGCAGCAGAAGAGATATCCA   | 100                | 1.921 ( $\pm$ 0.00568)     |
|                | Ma1034R   | CATACGTTCCGGCAAAATCCTT  |                    |                            |
| <i>MaAMY1</i>  | Ma1155F   | CTTGTGCCAGACTGCGTATC    | 116                | 1.981 ( $\pm$ 0.0356)      |
|                | Ma1155R   | ATGCTGCAAGAATCGACAAC    |                    |                            |
| <i>MaAMY2</i>  | Ma1157F   | CATGACCCATTGCCAATCTT    | 99                 | NA                         |
|                | Ma1157R   | CCATAGTCGCTCCAAGATCA    |                    |                            |
| <i>MaAMY3</i>  | Ma1159F   | CTTGTGCCAAACTGCGTATC    | 131                | 1.998 ( $\pm$ 0.0163)      |
|                | Ma1159R   | CTCGCTCCGATCTCTATGCT    |                    |                            |
| <i>MaAMY4</i>  | Ma1161F   | ACCAAAGTCGACTCGGTCA     | 129                | 2.097 ( $\pm$ 0.064)       |
|                | Ma1161R   | TATAGCCAACGCTGGAGTCA    |                    |                            |
| <i>MaAMY5</i>  | Ma1194F   | TTTCCCTTGTTGGCCGTGAG    | 134                | 2.03 ( $\pm$ 0.0333)       |

|                |         |                          |     |                        |
|----------------|---------|--------------------------|-----|------------------------|
|                | Ma1194R | AGCACCATGGAACCTCGATTATTC |     |                        |
| <i>MaAMY8</i>  | Ma1198F | AACTAGCCCTTGCGGTTAC      | 115 | 1.957 ( $\pm 0.0589$ ) |
|                | Ma1198R | CTACGTCGAACAAACGCAGC     |     |                        |
| <i>MaAMY12</i> | Ma1153F | ATAGCTGAAACCTCGGAGCA     | 129 | 2.014 ( $\pm 0.0373$ ) |
|                | Ma1153R | TGGGTTGTAGCAGCTGAAGG     |     |                        |

---

NA, not available value *i.e.* gene not or very weakly expressed.

\*Efficiency (E) and mean squared error ( $\pm$ SE) for primer pair in pulp tissue.

**Supplementary Table S4.** Isoform numbers of starch metabolism-related gene families in 12 plant genomes

| Gene family   | Plant species |           |           |           |           |           |           |           |           |           |           |           |
|---------------|---------------|-----------|-----------|-----------|-----------|-----------|-----------|-----------|-----------|-----------|-----------|-----------|
|               | Monocots      |           |           |           |           |           | Dicots    |           |           |           |           |           |
|               | Ma            | Os        | Bd        | Sb        | Zm        | Pd        | At        | Vv        | Sl        | St        | Pp        | Fv        |
| <i>AGPase</i> | 7             | 6         | 5         | 7         | 7         | 7         | 6         | 6         | 6         | 5         | 6         | 5         |
| <i>SS</i>     | 10            | 9         | 7         | 8         | 7         | 8         | 5         | 6         | 6         | 6         | 6         | 6         |
| <i>GBSS</i>   | 4             | 2         | 2         | 2         | 2         | 1         | 1         | 2         | 1         | 1         | 2         | 2         |
| <i>SBE</i>    | 4             | 3         | 3         | 3         | 4         | 3         | 2         | 2         | 2         | 2         | 2         | 3         |
| <i>DBE</i>    | 4             | 3         | 3         | 3         | 3         | 3         | 3         | 3         | 3         | 3         | 3         | 3         |
| <i>BAM</i>    | 13            | 10        | 11        | 10        | 13        | 10        | 9         | 9         | 8         | 8         | 10        | 9         |
| <i>AMY</i>    | 13            | 10        | 5         | 11        | 7         | 4         | 3         | 8         | 5         | 3         | 5         | 4         |
| <b>Total</b>  | <b>46</b>     | <b>37</b> | <b>30</b> | <b>38</b> | <b>36</b> | <b>30</b> | <b>24</b> | <b>31</b> | <b>26</b> | <b>23</b> | <b>29</b> | <b>26</b> |

Ma, *Musa acuminata*; Os, *Oryza sativa*; Bd, *Brachypodium distachyon*; Sb, *Sorghum bicolor*; Zm, *Zea mays*; Pd, *Phoenix dactylifera*; At, *Arabidopsis thaliana*, Vv, *Vitis vinifera*; Sl, *Solanum lycopersicum*; St, *Solanum tuberosum*; Pp, *Prunus persica*; Fv, *Fragaria vesca*; AGPase, ADP-glucose pyrophosphorylase; SS, soluble starch synthase; GBSS, granule-bound starch synthase; SBE, starch branching enzyme; DBE, debranching enzyme; AMY,  $\alpha$ -amylase and BAM,  $\beta$ -amylase.



**Supplementary Table S5.** Table of starch metabolism-related genes identified in banana

| <b>Gene family</b> | <b>Gene order*</b> | <b>Gene name</b> | <b>Locus identifier</b> | <b>Genome version 1<sup>s</sup></b> |
|--------------------|--------------------|------------------|-------------------------|-------------------------------------|
| <i>AGPase</i>      | 1                  | <i>MaAGP1</i>    | GSMUA_Achr1G09400       | 001                                 |
| <i>AGPase</i>      | 2                  | <i>MaAGP2</i>    | GSMUA_Achr1G11820       | 001                                 |
| <i>AGPase</i>      | 3                  | <i>MaAGP3</i>    | GSMUA_Achr3G21710       | 001                                 |
| <i>AGPase</i>      | 4                  | <i>MaAGP4</i>    | GSMUA_Achr4G02930       | 001                                 |
| <i>AGPase</i>      | 5                  | <i>MaAGP5</i>    | GSMUA_Achr4G10620       | 001                                 |
| <i>AGPase</i>      | 6                  | <i>MaAGP6</i>    | GSMUA_Achr6G27190       | 001                                 |
| <i>AGPase</i>      | 7                  | <i>MaAGP7</i>    | GSMUA_Achr9G06920       | 001                                 |
| <i>SS</i>          | 1                  | <i>MaSS1</i>     | GSMUA_Achr1G24640       | 001                                 |
| <i>SS</i>          | 2                  | <i>MaSS2</i>     | GSMUA_Achr1G24650       | 001                                 |
| <i>SS</i>          | 3                  | <i>MaSS3</i>     | GSMUA_Achr3G03290       | 001                                 |
| <i>SS</i>          | 4                  | <i>MaSS4</i>     | GSMUA_Achr3G16340       | 001                                 |
| <i>SS</i>          | 5                  | <i>MaSS5</i>     | GSMUA_Achr4G10220       | 001                                 |
| <i>SS</i>          | 6                  | <i>MaSS6</i>     | GSMUA_Achr5G00700       | 001                                 |
| <i>SS</i>          | 7                  | <i>MaSS7</i>     | GSMUA_Achr6G23190       | 001                                 |
| <i>SS</i>          | 8                  | <i>MaSS8</i>     | GSMUA_Achr8G24090       | 001                                 |
| <i>SS</i>          | 9                  | <i>MaSS9</i>     | GSMUA_Achr8G27560       | 001                                 |
| <i>SS</i>          | 10                 | <i>MaSS10</i>    | GSMUA_Achr11G18560      | 001                                 |
| <i>GBSS</i>        | 1                  | <i>MaGBSS1</i>   | GSMUA_Achr1G06140       | 001                                 |
| <i>GBSS</i>        | 2                  | <i>MaGBSS2</i>   | GSMUA_Achr1G08190       | 001                                 |
| <i>GBSS</i>        | 3                  | <i>MaGBSS3</i>   | GSMUA_Achr1G16610       | 001                                 |
| <i>GBSS</i>        | 4                  | <i>MaGBSS4</i>   | GSMUA_Achr9G20780       | 001                                 |
| <i>SBE</i>         | 1                  | <i>MaSBE1</i>    | GSMUA_Achr4G04690       | 001                                 |
| <i>SBE</i>         | 2                  | <i>MaSBE2</i>    | GSMUA_Achr5G16760       | 001                                 |
| <i>SBE</i>         | 3                  | <i>MaSBE3</i>    | GSMUA_Achr6G07530       | 001                                 |
| <i>SBE</i>         | 4                  | <i>MaSBE4</i>    | GSMUA_Achr6G13530       | 001                                 |
| <i>SBE</i>         | 5                  | <i>MaSBE5</i>    | GSMUA_Achr6G24120       | 001                                 |
| <i>DBE</i>         | 1                  | <i>MaDBE1</i>    | GSMUA_Achr6G16190       | 001                                 |
| <i>DBE</i>         | 2                  | <i>MaDBE2</i>    | GSMUA_Achr6G16200       | 001                                 |
| <i>DBE</i>         | 3                  | <i>MaDBE3</i>    | GSMUA_Achr9G14020       | 001                                 |
| <i>DBE</i>         | 4                  | <i>MaDBE4</i>    | GSMUA_Achr9G14980       | 001                                 |
| <i>AMY</i>         | 1                  | <i>MaAMY1</i>    | GSMUA_Achr1G02190       | 001                                 |
| <i>AMY</i>         | 2                  | <i>MaAMY2</i>    | GSMUA_Achr1G02210       | 001                                 |
| <i>AMY</i>         | 3                  | <i>MaAMY3</i>    | GSMUA_Achr1G02230       | 001                                 |
| <i>AMY</i>         | 4                  | <i>MaAMY4</i>    | GSMUA_Achr3G07130       | 001                                 |
| <i>AMY</i>         | 5                  | <i>MaAMY5</i>    | GSMUA_Achr3G07190       | 001                                 |
| <i>AMY</i>         | 6                  | <i>MaAMY6</i>    | GSMUA_Achr5G08130       | 001                                 |
| <i>AMY</i>         | 7                  | <i>MaAMY7</i>    | GSMUA_Achr5G08290       | 001                                 |
| <i>AMY</i>         | 8                  | <i>MaAMY8</i>    | GSMUA_Achr5G08340       | 001                                 |
| <i>AMY</i>         | 9                  | <i>MaAMY9</i>    | GSMUA_Achr5G10560       | 001                                 |
| <i>AMY</i>         | 10                 | <i>MaAMY10</i>   | GSMUA_Achr7G18920       | 001                                 |
| <i>AMY</i>         | 11                 | <i>MaAMY11</i>   | GSMUA_Achr7G26940       | 001                                 |
| <i>AMY</i>         | 12                 | <i>MaAMY12</i>   | GSMUA_Achr8G04140       | 001                                 |
| <i>AMY</i>         | 13                 | <i>MaAMY13</i>   | GSMUA_Achr10G30130      | 001                                 |
| <i>BAM</i>         | 1                  | <i>MaBAM1</i>    | GSMUA_Achr1G17440       | 001                                 |
| <i>BAM</i>         | 2                  | <i>MaBAM2</i>    | GSMUA_Achr2G04590       | 001                                 |
| <i>BAM</i>         | 3                  | <i>MaBAM3</i>    | GSMUA_Achr2G14060       | 001                                 |
| <i>BAM</i>         | 4                  | <i>MaBAM4</i>    | GSMUA_Achr3G08860       | 001                                 |
| <i>BAM</i>         | 5                  | <i>MaBAM5</i>    | GSMUA_Achr3G27320       | 001                                 |
| <i>BAM</i>         | 6                  | <i>MaBAM6</i>    | GSMUA_Achr4G17840       | 001                                 |

|            |    |                |       |              |                  |
|------------|----|----------------|-------|--------------|------------------|
| <i>BAM</i> | 7  | <i>MaBAM7</i>  | GSMUA | Achr5G08040  | 001              |
| <i>BAM</i> | 8  | <i>MaBAM8</i>  | GSMUA | Achr5G10120  | 001              |
| <i>BAM</i> | 9  | <i>MaBAM9</i>  | GSMUA | Achr6G05840  | 001              |
| <i>BAM</i> | 10 | <i>MaBAM10</i> | GSMUA | Achr7G11100  | 001              |
| <i>BAM</i> | 11 | <i>MaBAM11</i> | GSMUA | Achr8G14930  | 001              |
| <i>BAM</i> | 12 | <i>MaBAM12</i> | GSMUA | Achr10G09320 | 001              |
| <i>BAM</i> | 13 | <i>MaBAM13</i> | GSMUA | AchrUn       | randomG28890 001 |

---

\*Gene order in Fig. 4A; <sup>S</sup>D'Hont et al., 2012

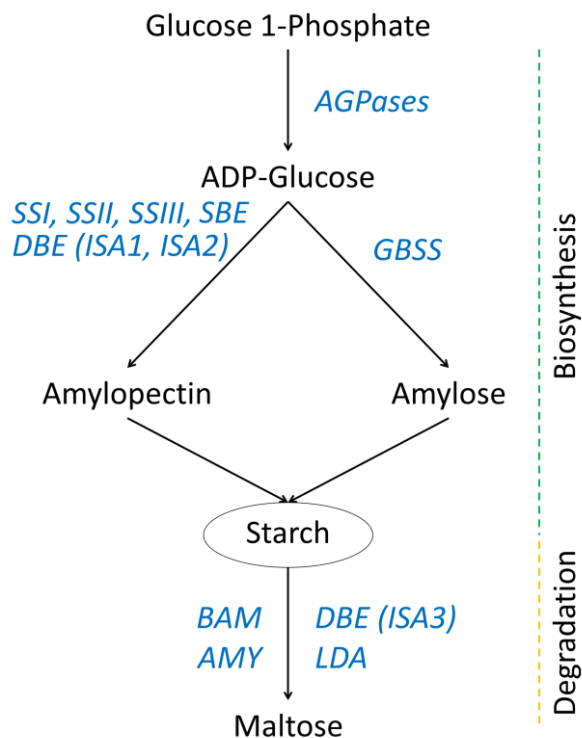

### Supplementary Figure S1. Schematic and simplified view of starch biosynthesis and degradation

Major gene families involved are indicated in blue. Adenosine diphosphoglucose (ADP-glucose), the glucose donor for starch synthesis is synthesized by ADP-glucose pyrophosphorylases (AGPases) that use adenosine triphosphate (ATP) and glucose-1-phosphate as substrates. Starch synthases (SS) catalyze the transfer of glucose from ADP-glucose to non-reducing ends of glucose chains via  $\alpha$ -1,4-bonds. Synthesis of amylopectin requires the elongation of glucan chains by SSI-IV soluble starch synthases and the introduction of branch points by SBE starch branching enzymes. ISA1 and ISA2 debranching enzymes (DBE) are proposed to be involved in the removal of misplaced amylopectin branches. Granule-bound starch synthases (GBSS) synthesizes very long glucan chains that are found mainly in amylose. Starch breakdown is dependent on the phosphorylation status of glucans at the surface of starch granules. The exo-acting  $\beta$ -amylases (BAM) release  $\beta$ -maltose from exposed non-reducing ends of chains. Endo-acting  $\alpha$ -amylases (AMY) hydrolyze  $\alpha$ -1,4-linked glucose chains and release a mixture of soluble linear and branched oligosaccharides. Debranching enzymes ISA3 and pullulanases/limit dextrinases (LDA) are involved in breakdown of branched amylopectin chains. Based on reviews by (Zeeman et al., 2010; Streb and Zeeman, 2012).

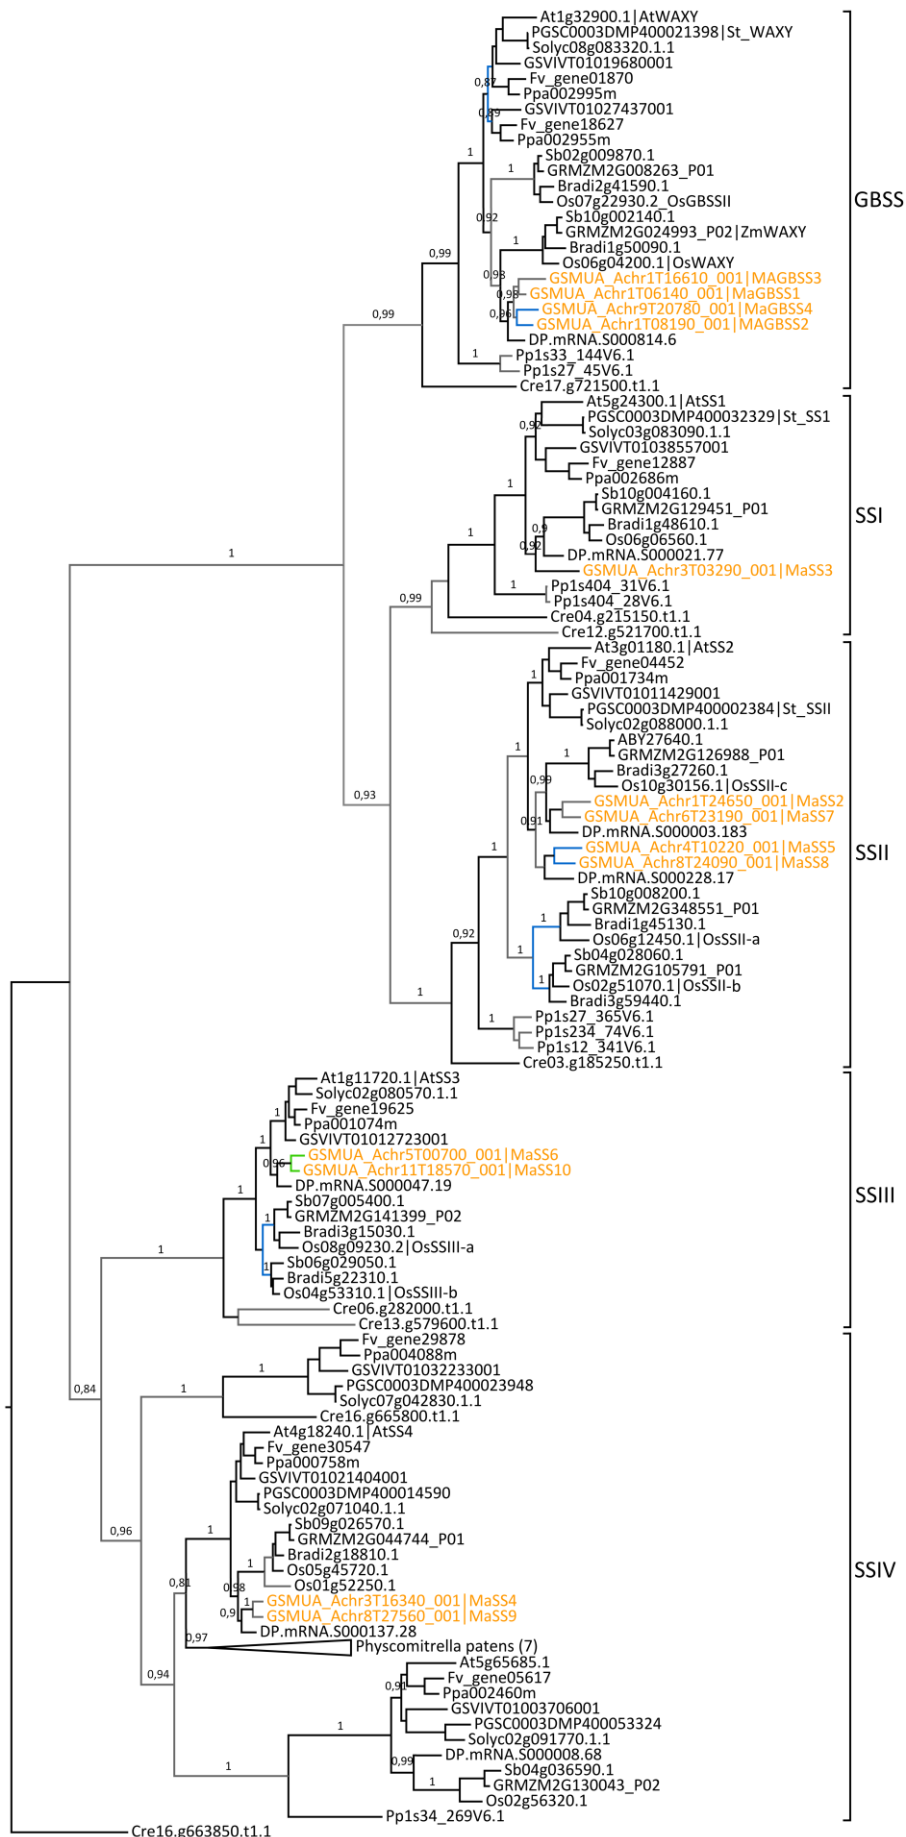

**Supplementary Figure S2. Maximum likelihood phylogenetic tree of starch synthase (SS and GBSS) predicted proteins.**

Only supports (aLRT statistics with SH-like procedure) of main branches are indicated. *Chlamydomonas reinhardtii* (Cre), *Physcomitrella patens* (Pp), Grapevine (GSVIV), tomato (Solyc), potato (PGSC), woodland strawberry (Fv), *Arabidopsis* (At), peach (Ppa), *Brachypodium* (Bradi), rice (Os), maize (GRMZM), sorghum (Sb), date palm (DP) and banana (Ma) identifiers are indicated (in brown for banana). Branches are colored according to gene duplication modes: WGD (blue), segmental (green), tandem/proximal (red) and unknown (grey). Black branches correspond to speciation events. The scale bar corresponds to estimated amino acid substitutions per site. Sequences were grouped using the tree topology and previously published classifications (Patron and Keeling, 2005; Leterrier et al., 2008).

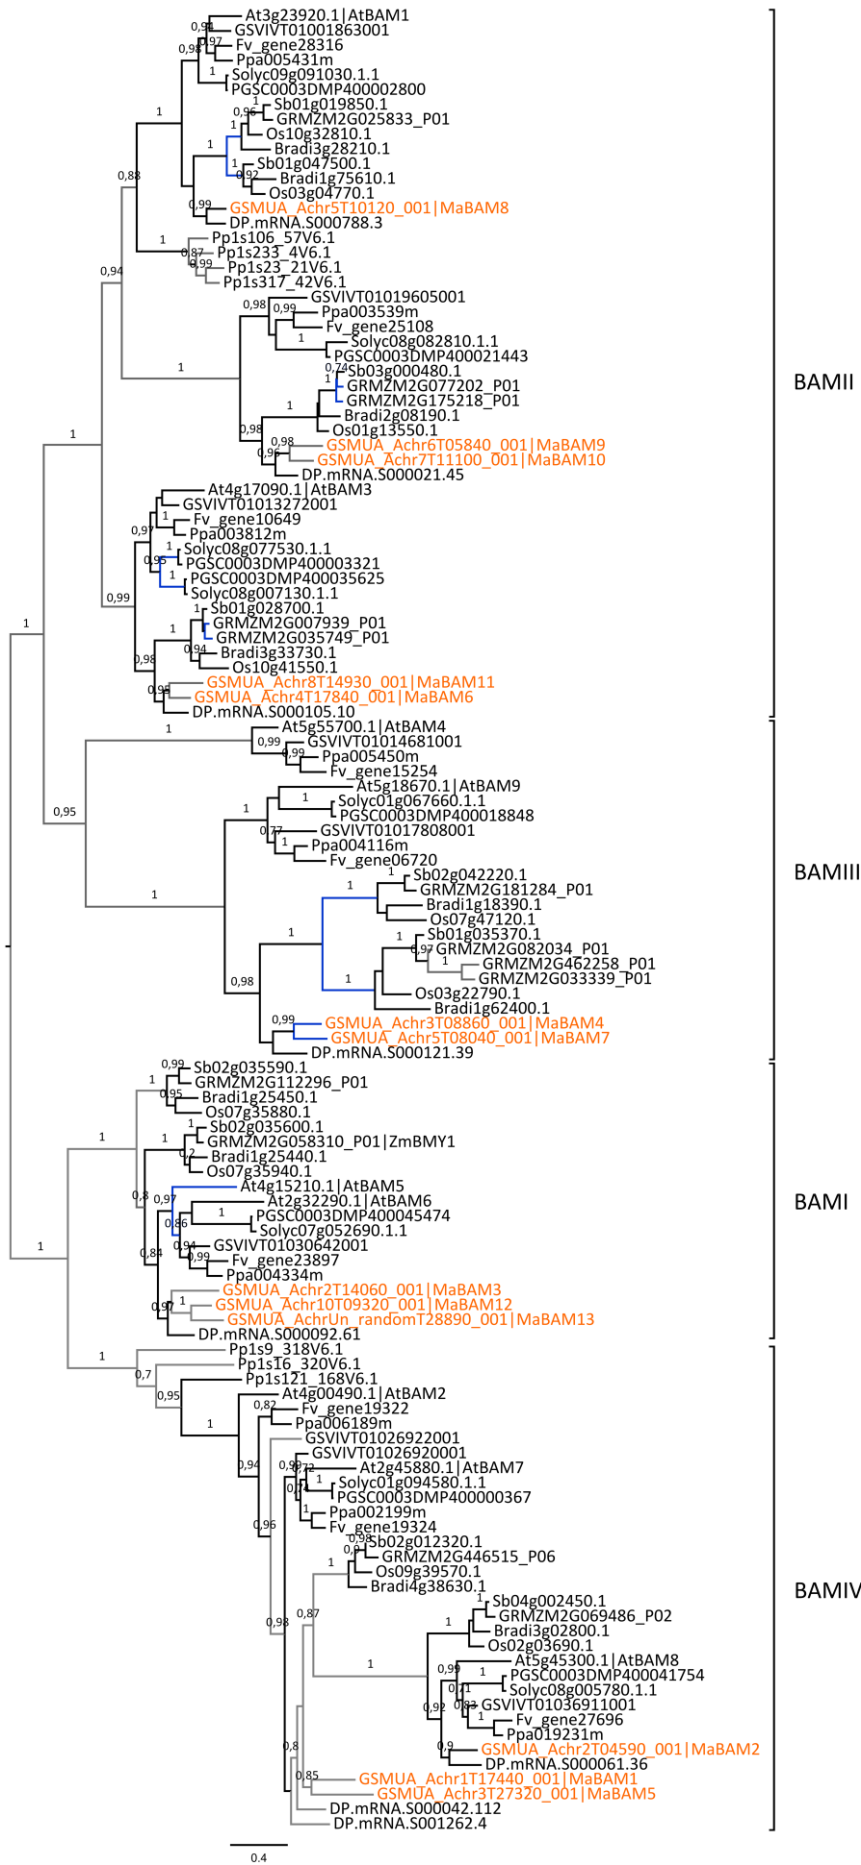

**Supplementary Figure S3. Phylogenetic analysis of the BAM family.**

The maximum likelihood tree of BAM predicted proteins was rooted using midpoint. Supports  $>0.70$  (aLRT statistics with SH-like procedure) are indicated. *Physcomitrella patens* (Pp), Grapevine (GSVIV), tomato (Solyc), potato (PGSC), woodland strawberry (Fv), *Arabidopsis* (At), peach (Ppa), *Brachypodium* (Bradi), rice (Os), maize (GRMZM), Sorghum (Sb), date palm (DP) and banana (GSMUA) identifiers are indicated (in brown for banana). Branches are colored according to gene duplication modes: WGD (blue), segmental (green), tandem/proximal (red) and unknown (grey). Black branches correspond to speciation events. The scale bar corresponds to estimated amino acid substitutions per site. Sequences were grouped using the tree topology and a previous classification (Fulton et al., 2008).

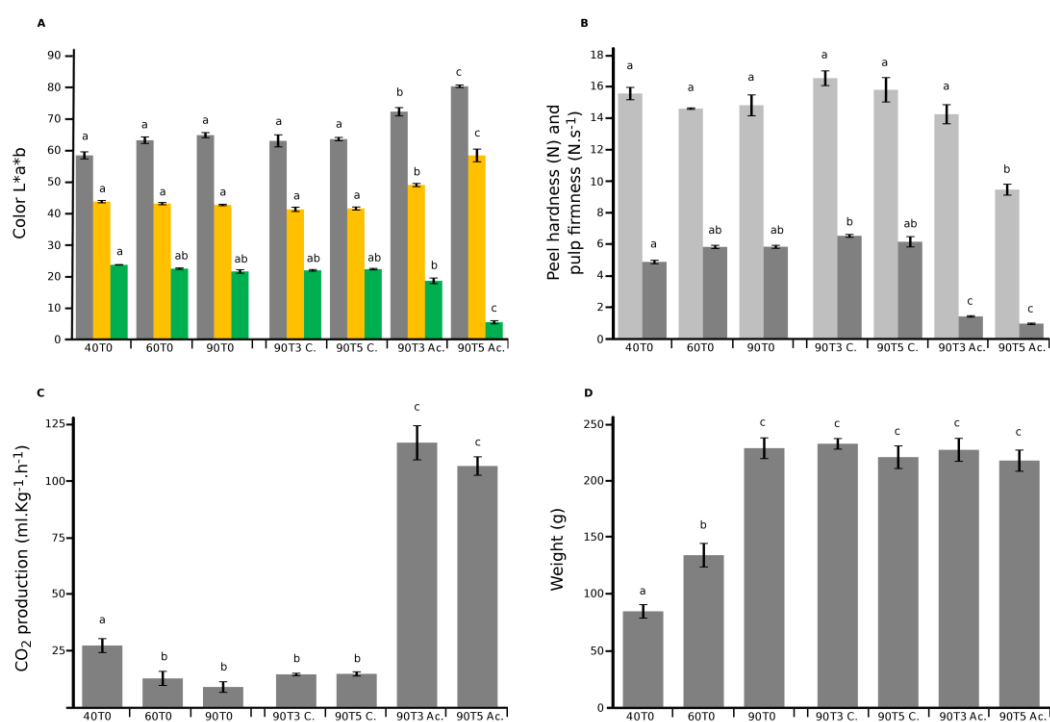

**Supplementary Figure S4. Changes of physicochemical parameters of banana fruits during green fruit development and ripening.**

(A) Switch from green banana fruits to yellow banana fruits. Banana fruit colors were estimated through the color space CIE L\*a\*b\*. Green, yellow and grey histograms represent - a, b and L values without unit, respectively. (B) Rheological properties of banana fruits before and after acetylene treatment. Light grey and dark grey histograms represent peel hardness (expressed in Newton (N)) and pulp firmness (expressed in N.s<sup>-1</sup>), respectively. (C) Respiration of banana fruits before and after acetylene treatment. Carbon dioxide productions of banana fruits are expressed in ml.Kg<sup>-1</sup>.h<sup>-1</sup> (D) Filling of banana fruits during green banana fruit development. Fruit weight is expressed in grams (g). All parameters were measured individually on all fruits harvested at 40, 60 and 90 DAF immediately after harvest (40T0, 60T0 and 90T0, respectively), on fruits harvested at 90 DAF then treated 24h with acetylene and stored two or four additional days (90T3 Ac. and 90T5 Ac., respectively) and on control fruits not treated and stored three (90T3C.) and five days (90T5C.). Means, standard errors and different groups from multiple comparisons with confidence interval at 95% (ANOVA followed by Tukey's test) are indicated.



## Supplementary References

Al-Mssallem I.S., Hu S., Zhang X., Lin Q., Liu W., Tan J., Yu X., Liu J., Pan L., Zhang T., Yin Y., Xin C., Wu H., Zhang G., Ba Abdullah M.M., Huang D., Fang Y., Alnakhli Y.O., Jia S., Yin A., Alhuzimi E.M., Alsaihati B.A., Al-Owayyed S.A., Zhao D., Zhang S., Al-Otaibi N.A., Sun G., Majrashi M.A., Li F., Tala, Wang J., Yun Q., Alnassar N.A., Wang L., Yang M., Al-Jelaify R.F., Liu K., Gao S., Chen K., Alkhalidi S.R., Liu G., Zhang M., Guo H. and Yu J. 2013. Genome sequence of the date palm *Phoenix dactylifera* L. *Nature Communications*, 4. doi: 10.1038/ncomms3274.

Arabidopsis Genome Initiative. (2000). Analysis of the genome sequence of the flowering plant *Arabidopsis thaliana*. *Nature* 408, 796 – 815. doi: 10.1038/35048692

D'Hont, A., Denoeud, F., Aury, J.M., Baurens, F.C., Carreel, F., Garsmeur, O., Noel, B., Bocs, S., Droc, G., Rouard, M., Da Silva, C., Jabbari, K., Cardi, C., Poulain, J., Souquet, M., Labadie, K., Jourda, C., Lengelle, J., Rodier-Goud, M., Alberti, A., Bernard, M., Correa, M., Ayyampalayam, S., Mckain, M.R., Leebens-Mack, J., Burgess, D., Freeling, M., Mbeguie, A.M.D., Chabannes, M., Wicker, T., Panaud, O., Barbosa, J., Hribova, E., Heslop-Harrison, P., Habas, R., Rivallan, R., Francois, P., Poirion, C., Kilian, A., Burthia, D., Jenny, C., Bakry, F., Brown, S., Guignon, V., Kema, G., Dita, M., Waalwijk, C., Joseph, S., Dievart, A., Jaillon, O., Leclercq, J., Argout, X., Lyons, E., Almeida, A., Jeridi, M., Dolezel, J., Roux, N., Risterucci, A.M., Weissenbach, J., Ruiz, M., Glaszmann, J.C., Quetier, F., Yahiaoui, N., and Wincker, P. (2012). The banana (*Musa acuminata*) genome and the evolution of monocotyledonous plants. *Nature* 488, 213-217. doi: 10.1038/nature11241.

Chillet, M., De Bellaire, L.D., Hubert, O., and Mbeguie-A-Mbeguie, D. (2008). Mechanical characterisation of banana fruits. *Fruits* 63, 51-52. doi:10.1051/fruits:2007045

Fulton, D.C., Stettler M., Mettler T., Vaughan C.K., Li J., Francisco P., Gil M., Reinhold H., Eicke S., Messerli G., *et al.* (2008).  $\beta$ -AMYLASE4, a noncatalytic protein required for starch breakdown, acts upstream of three active  $\beta$ -amylases in *Arabidopsis* chloroplasts. *The Plant Cell* 20, 1040 –1058. doi: 10.1105/tpc.107.056507.

International Brachypodium Initiative (2010). Genome sequencing and analysis of the model grass *Brachypodium distachyon*. *Nature* 463, 763–768. doi: 10.1038/nature08747

Jaillon O., Aury J.-M., Noel B., Policriti A., Clepet C., Casagrande A., Choisne N., Aubourg S., Vitulo N., Jubin C., *et al.* (2007). The grapevine genome sequence suggests ancestral hexaploidization in major angiosperm phyla. *Nature* 449, 463–467. doi: 10.1038/nature06148

Leterrier M., Holappa L., Broglie K., Beckles D. (2008). Cloning, characterisation and comparative analysis of a starch synthase IV gene in wheat, functional and evolutionary implications. *BMC Plant Biology* 8, 98. doi: 10.1186/1471-2229-8-98

Ouyang S., Zhu W., Hamilton J., Lin H., Campbell M., Childs K., Thibaud-Nissen F., Malek R.L., Lee Y., Zheng L., *et al.* (2007). The TIGR rice genome annotation resource, improvements and new features. *Nucleic Acids Research* 35, D883–D887. doi: 10.1093/nar/gkl976

Paterson A.H., Bowers J.E., Bruggmann R., Dubchak I., Grimwood J., Gundlach H., Haberer G., Hellsten U., Mitros T., Poliakov A., *et al.* (2009). The *Sorghum bicolor* genome and the diversification of grasses. *Nature* 457, 551–556. doi: 10.1038/nature07723

Patron N.J., Keeling P.J. (2005). Common evolutionary origin of starch biosynthetic enzymes in green and red algae. *Journal of Phycology* 41, 1131–1141. doi: 10.1111/j.1529-8817.2005.00135.x.

Schnable P.S., Ware D., Fulton R.S., Stein J.C., Wei F., Pasternak S., Liang C., Zhang J., Fulton L., Graves T.A., *et al.* (2009). The B73 maize genome, complexity, diversity, and dynamics. *Science* 326, 1112–1115. doi: 10.1126/science.1178534

Shulaev V., Sargent D.J., Crowhurst R.N., Mockler T.C., Folkerts O., Delcher A.L., Jaiswal P., Mockaitis K., Liston A., Mane S.P., *et al.* (2011). The genome of woodland strawberry (*Fragaria vesca*). *Nature Genetics* 43, 109–116. doi: 10.1038/ng.740

Streb, S., and Zeeman, S.C. (2012). Starch metabolism in Arabidopsis. *The Arabidopsis book / American Society of Plant Biologists* 10, e0160. doi: 10.1199/tab.0160.

The Potato Genome Consortium (2011). Genome sequence and analysis of the tuber crop potato. *Nature* 475, 189–195. doi: 10.1038/nature10158

The Tomato Genome Consortium (2012). The tomato genome sequence provides insights into fleshy fruit evolution. *Nature* 485, 635–641. doi: 10.1038/nature11119

Verde I., Abbott A.G., Scalabrin S., Jung S., Shu S., Marroni F., Zhebentyayeva T., Dettori M.T., Grimwood J., Cattonaro F., *et al.* (2013). The high-quality draft genome of peach (*Prunus persica*) identifies unique patterns of genetic diversity, domestication and genome evolution. *Nature Genetics* 45, 487–494. doi : 10.1038/ng.2586

Zeeman, S.C., Kossmann, J., and Smith, A.M. (2010). Starch: its metabolism, evolution, and biotechnological modification in plants. *Annu. Rev. Plant Biol.* 61, 209-234. doi: 10.1146/annurev-arplant-042809-112301.
